# Supplementary material for: Biopolymers Used for Receptor Immobilization for Nickel-Detection Biosensors in Food
Source: MDPI journal article supplement (doi:10.3390/mi14081529), 2023-07-30
Supplement: s1 [file s1]

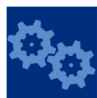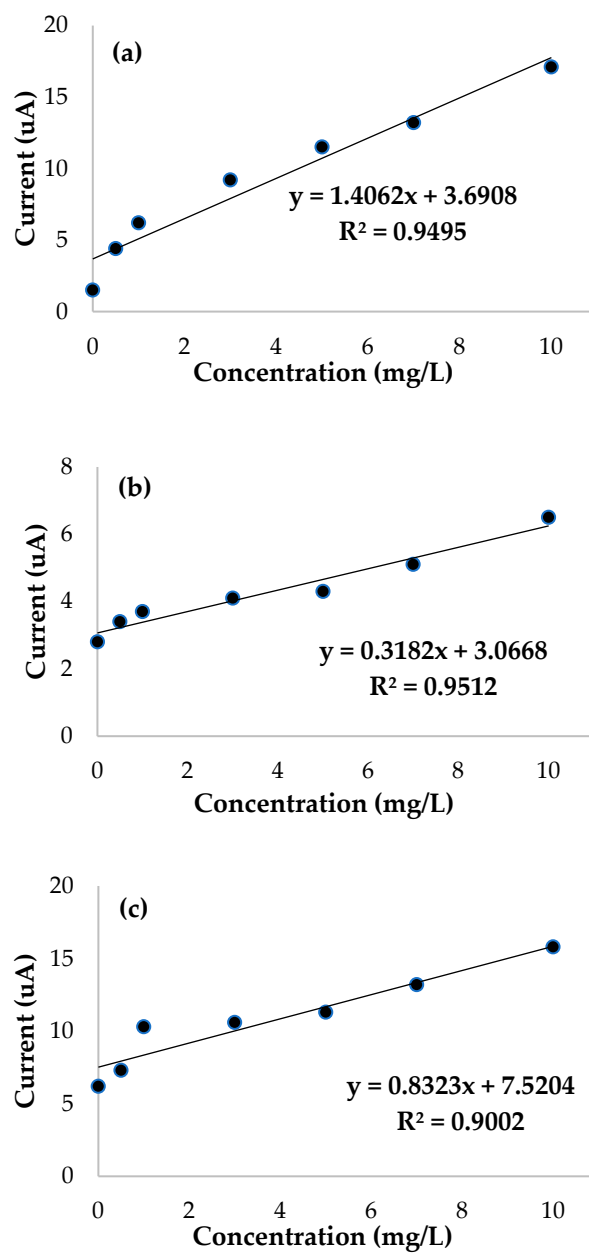

**Figure S1.** Calibration curves for the agar biopolymer chemosensor measured by cyclic voltammetry: (a) 0.5%, (b) 1%, (c) 1.5%;

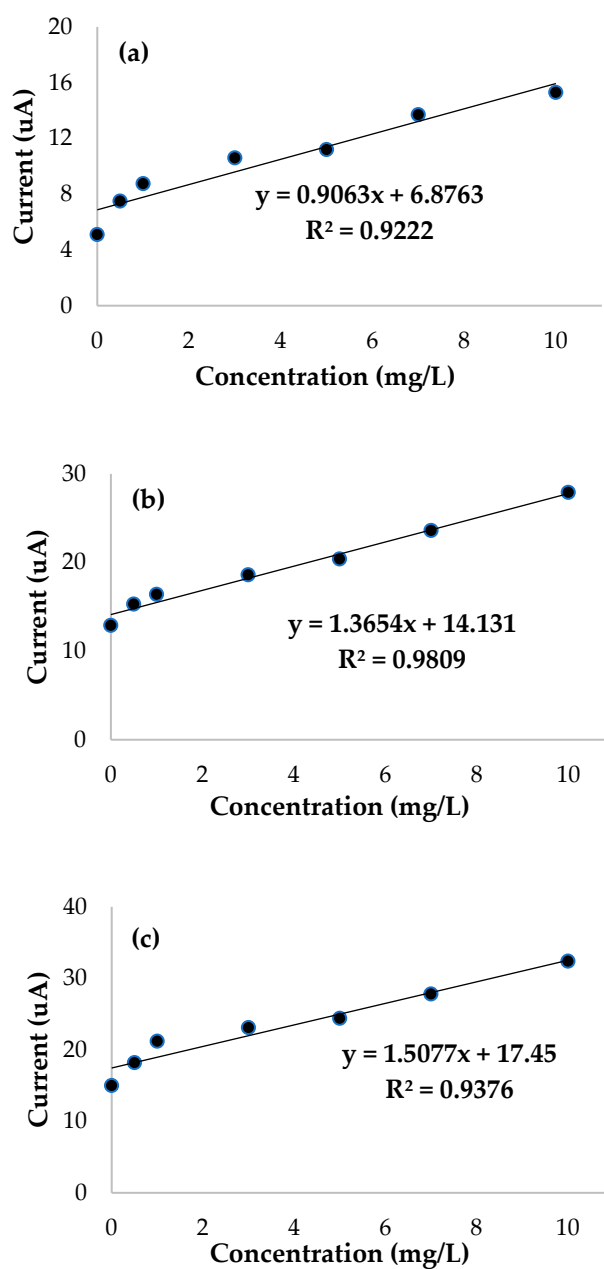

**Figure S2.** Calibration curves for the alginate biopolymer chemosensor measured by cyclic voltammetry: (a) 0.5%, (b) 1%, (c) 1.5%;

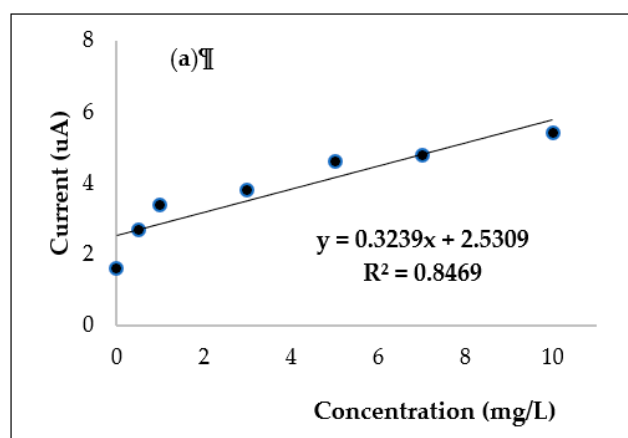

(a)

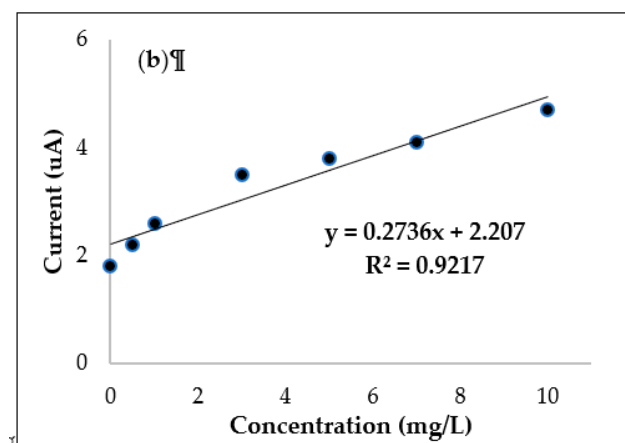

(b)

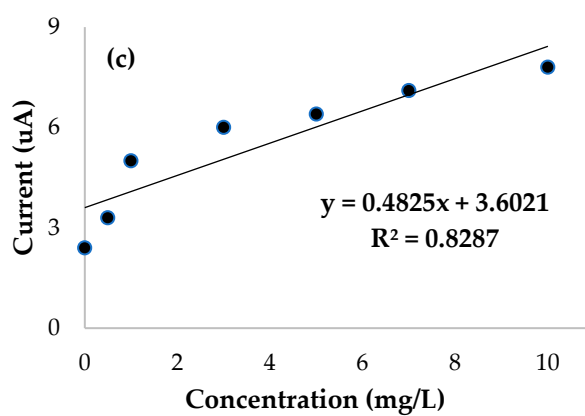

**Figure S3.** Calibration curves for the carrageenan biopolymer chemosensor measured by cyclic voltammetry: (a) 0.5%, (b) 1%, (c) 1.5%;

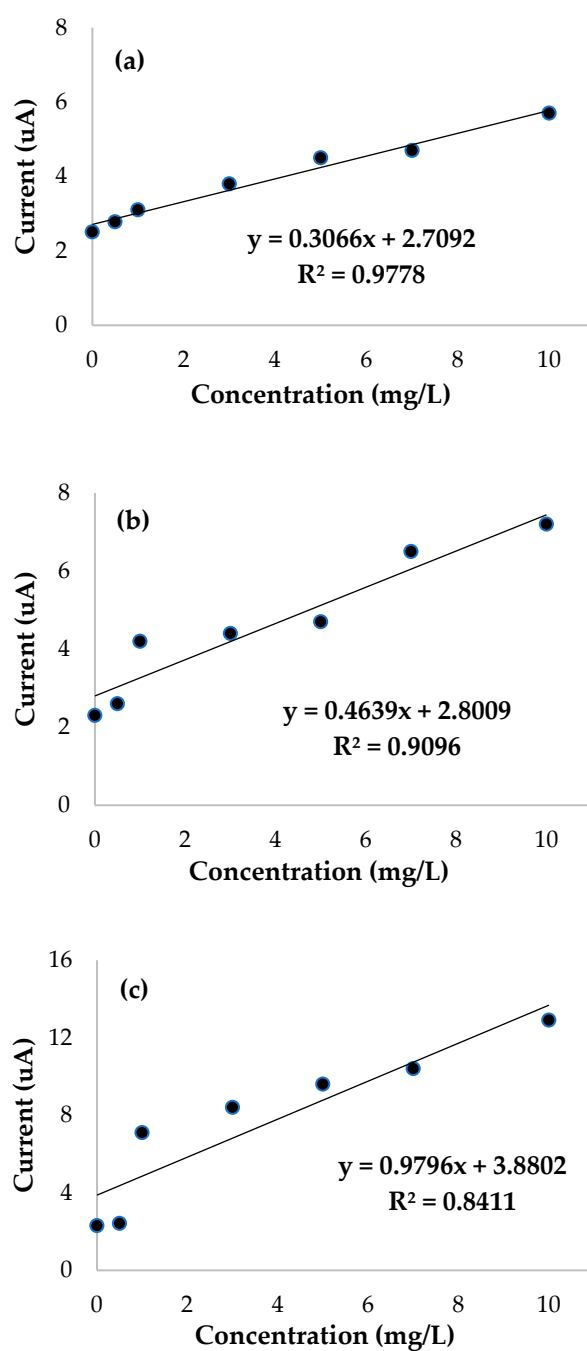

**Figure S4.** Calibration curves for the chitosan biopolymer chemosensor measured by cyclic voltammetry: (a) 0.5%, (b) 1%, (c) 1.5%;
